# Supplementary material for: Effect of Shenling Baizhu powder on immunity to diarrheal disease: A systematic review and meta-analysis
Source: Frontiers journal article supplement (doi:10.3389/fphar.2022.938932), 2022-09-14
Supplement: Data_Sheet_4.pdf [file Data_Sheet_4.pdf]

## Supplementary Figure

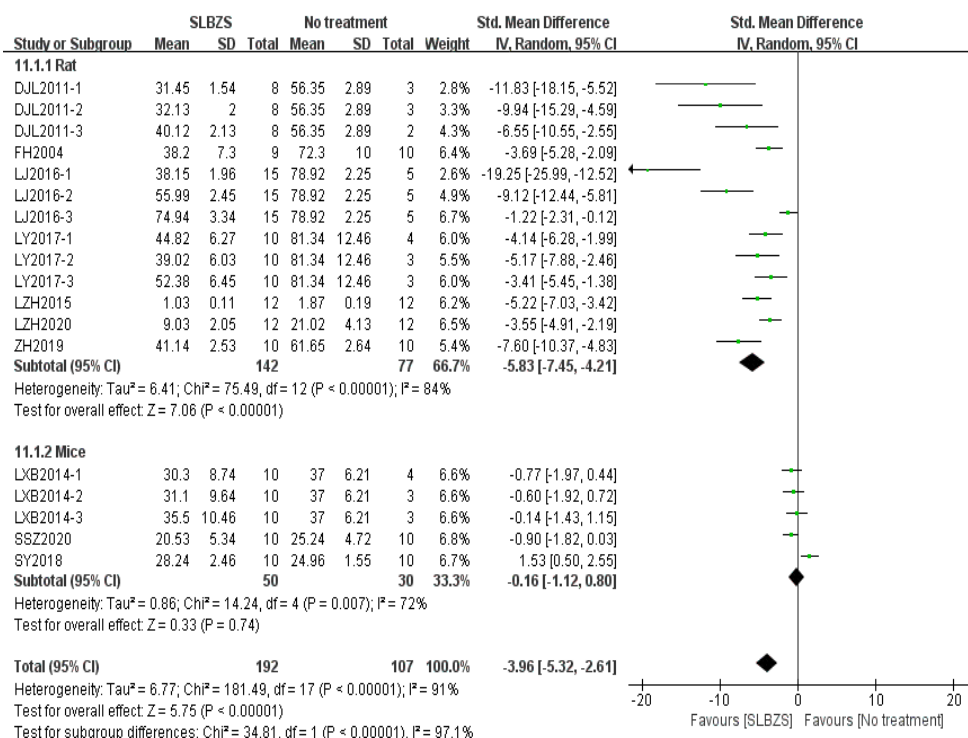Supplementary figure S1 Subgroup analysis of TNF- $\alpha$  by animal species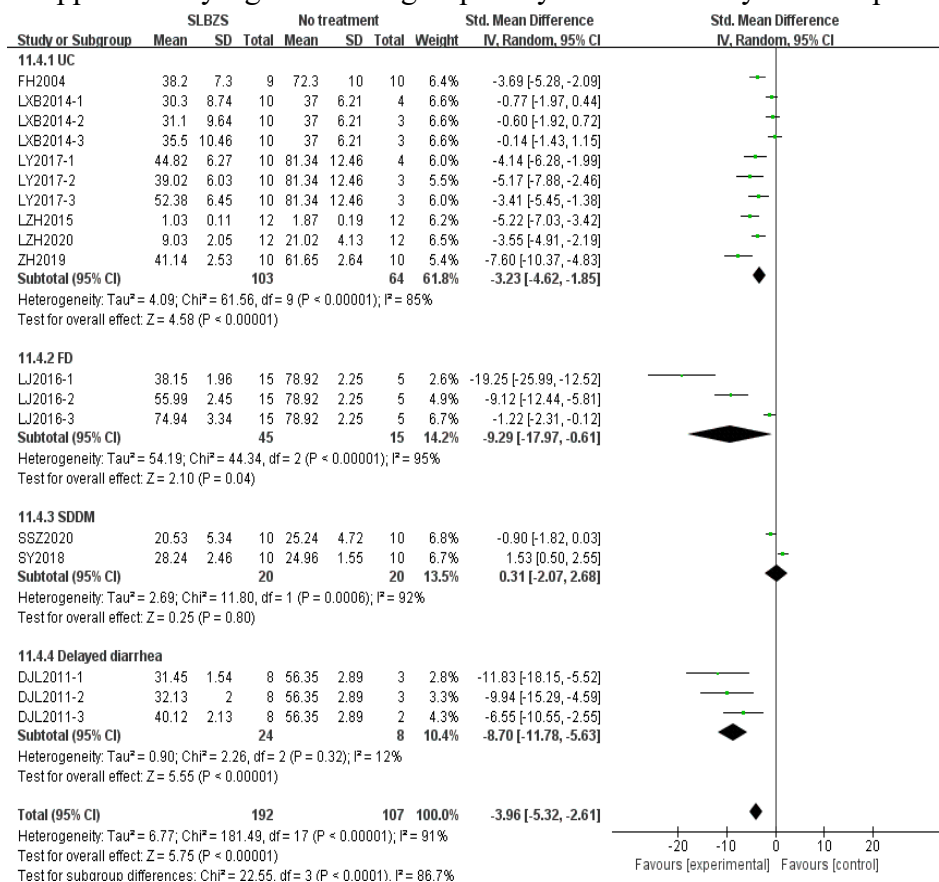Supplementary figure S2 Subgroup analysis of TNF- $\alpha$  by disease model

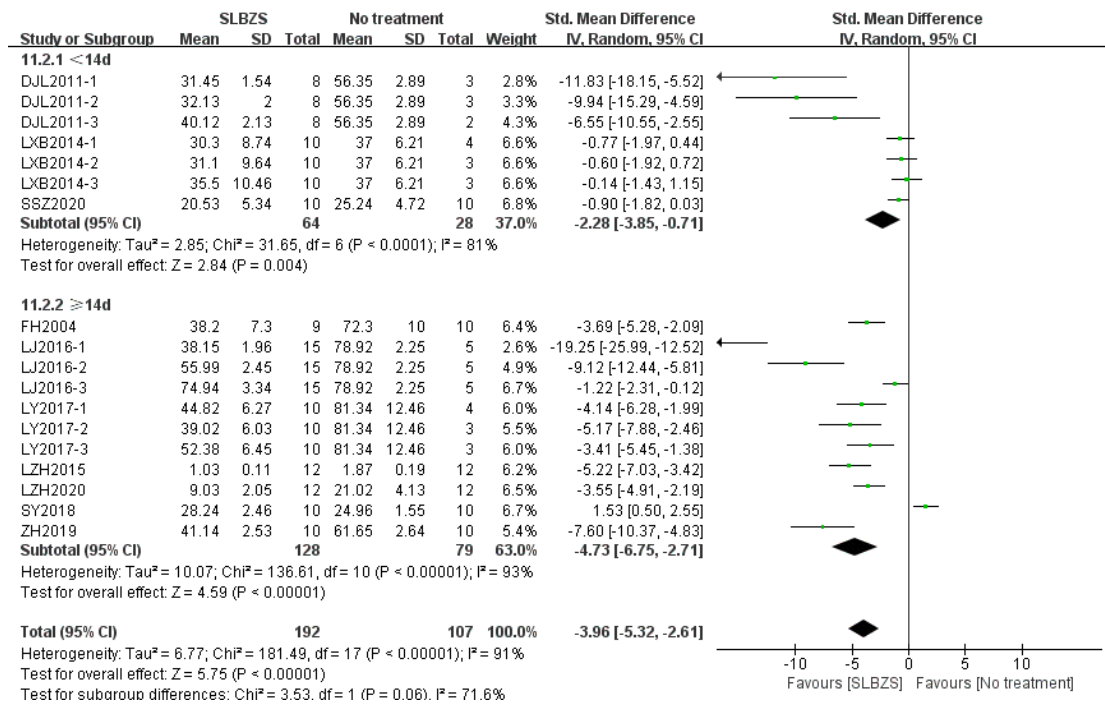Supplementary figure S3 Subgroup analysis of TNF- $\alpha$  by different duration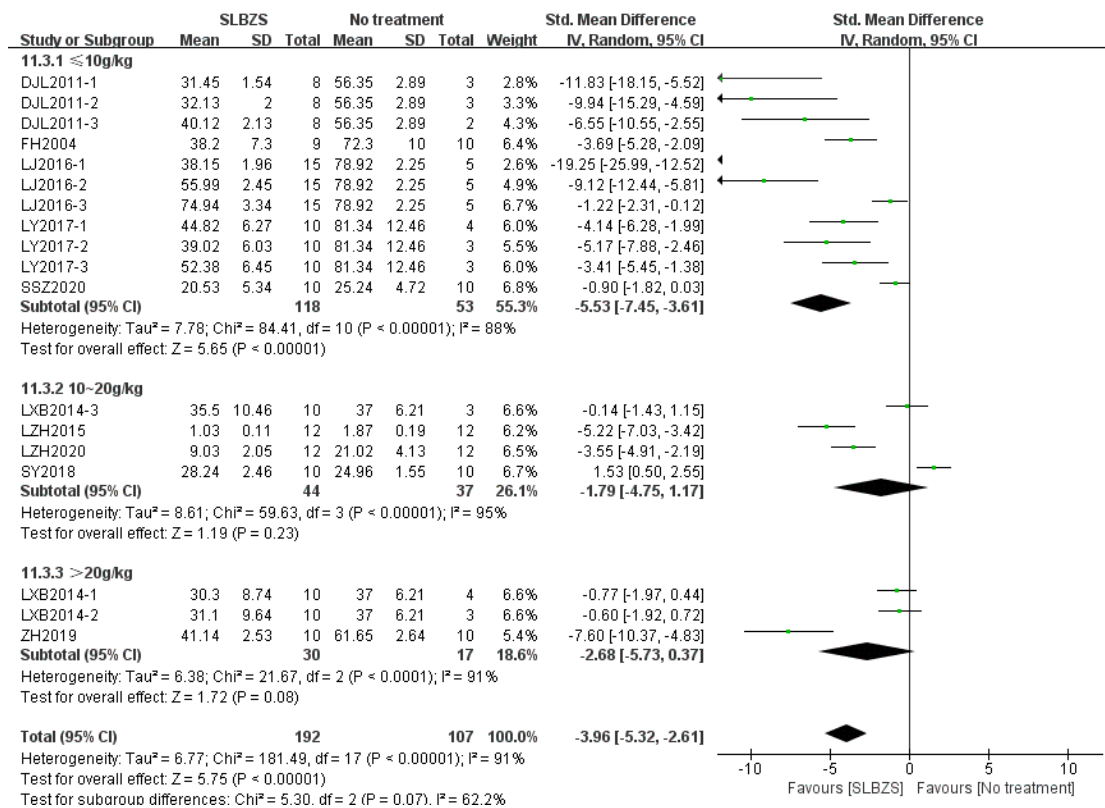Supplementary figure S4 Subgroup analysis of TNF- $\alpha$  by different doses

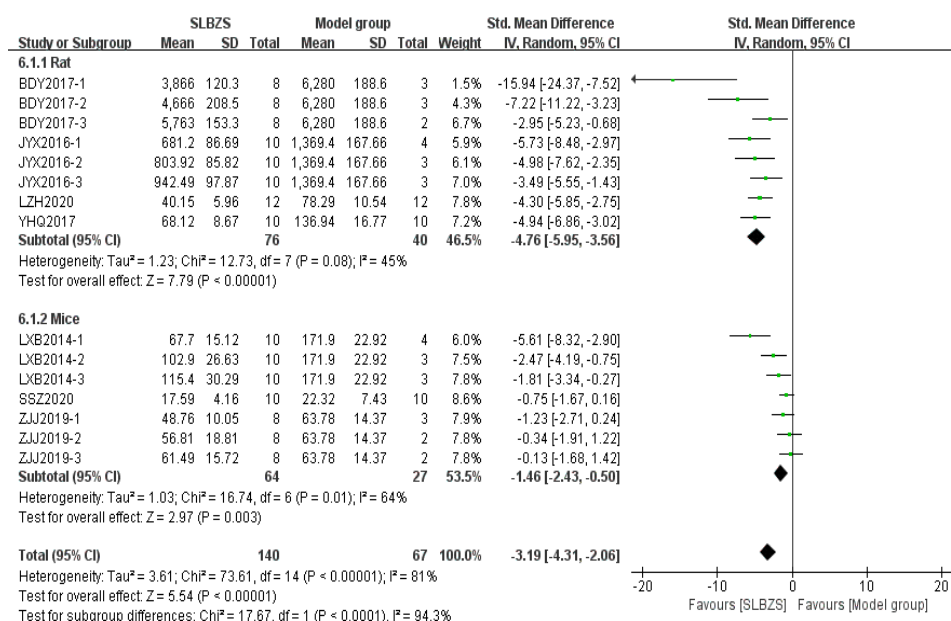Supplementary figure S5 Subgroup analysis of IL-1 $\beta$  by animal species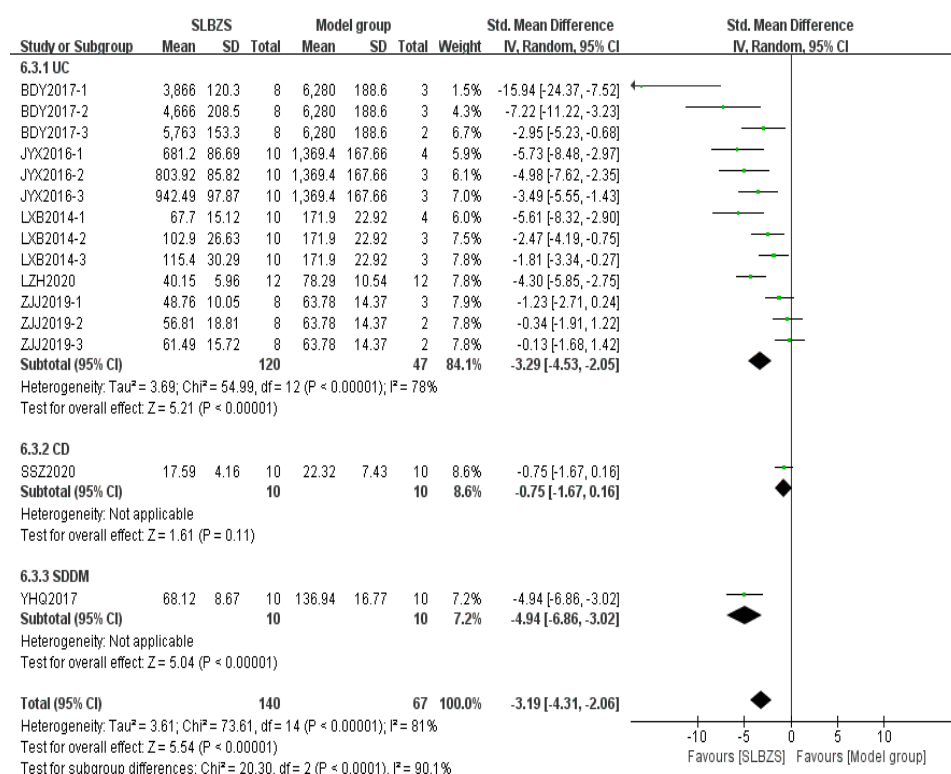Supplementary figure S6 Subgroup analysis of IL-1 $\beta$  by disease model

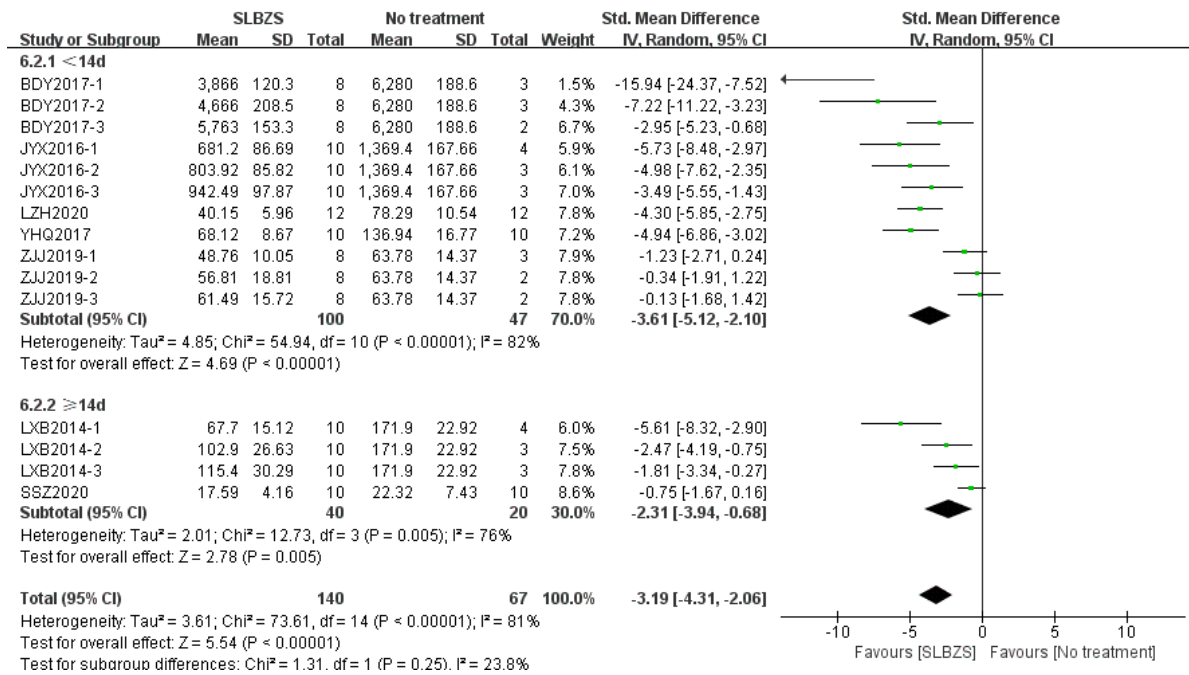Supplementary figure S7 Subgroup analysis of IL-1 $\beta$  by in different duration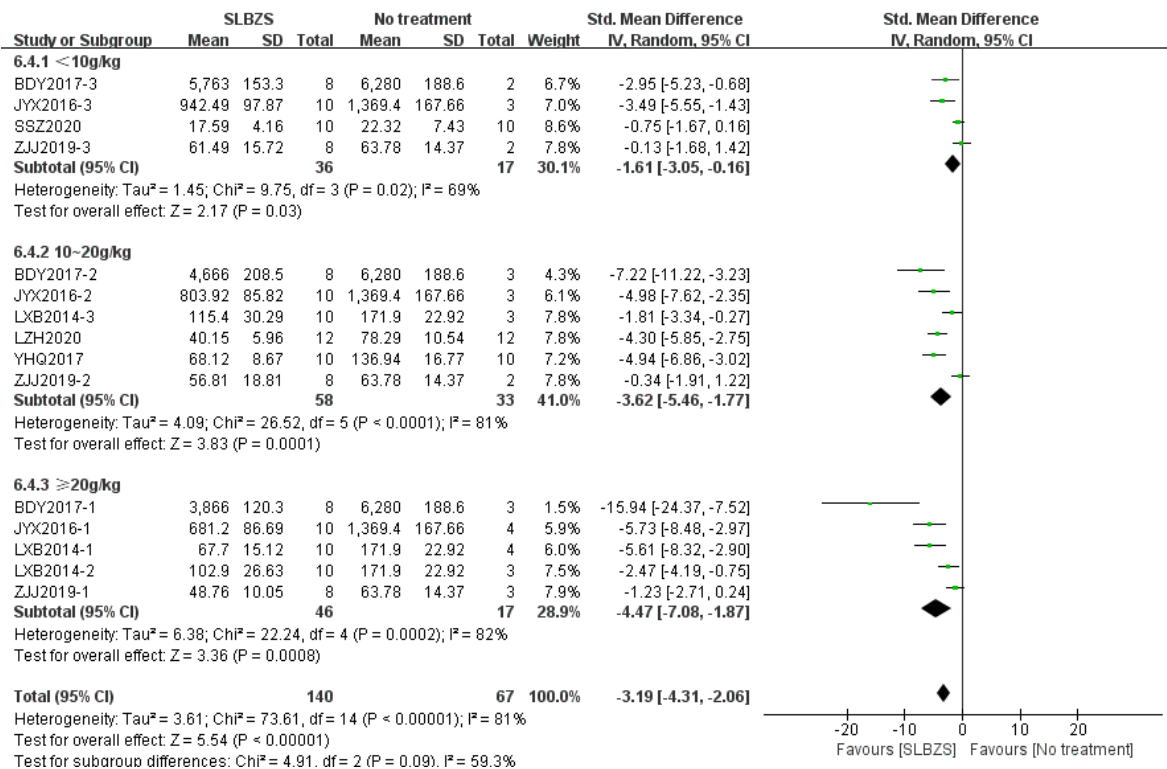Supplementary figure S8 Subgroup analysis of IL-1 $\beta$  by different doses

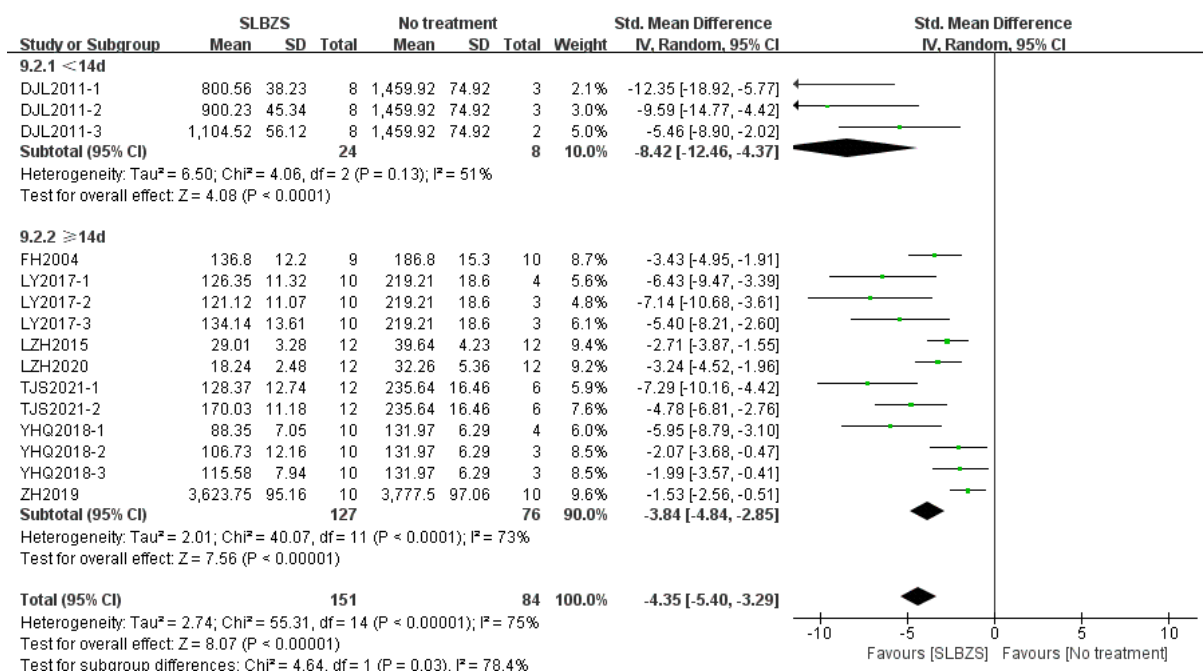

Supplementary figure S9 Subgroup analysis of IL-6 by disease model

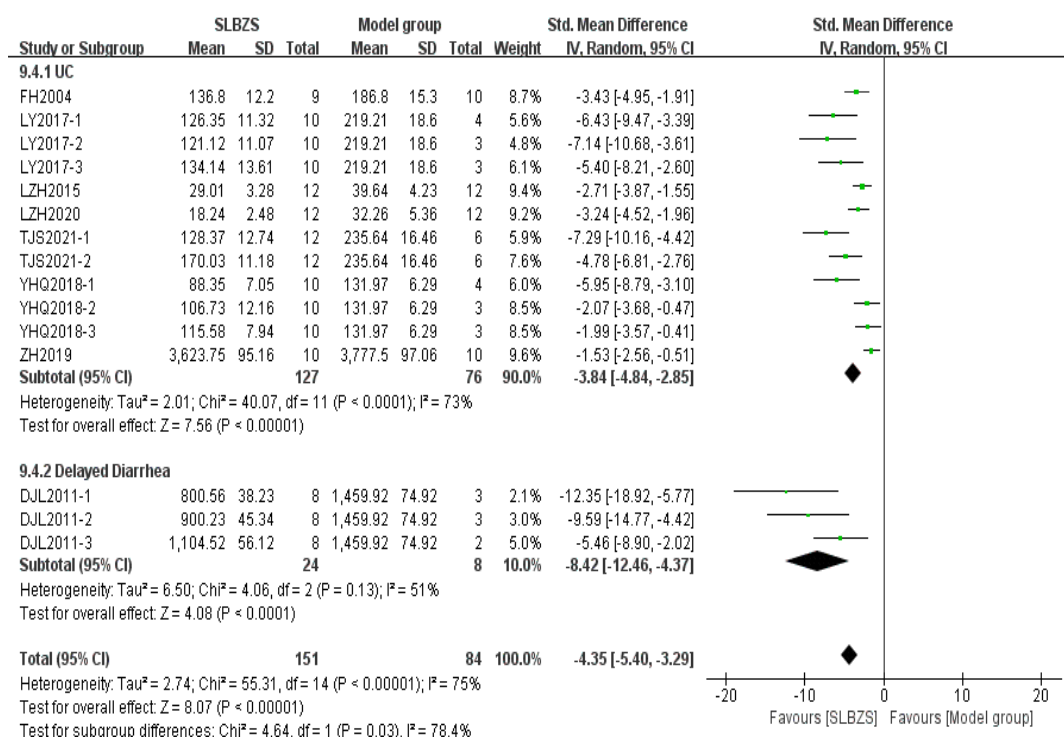

Supplementary figure S10 Subgroup analysis of IL-6 by different duration

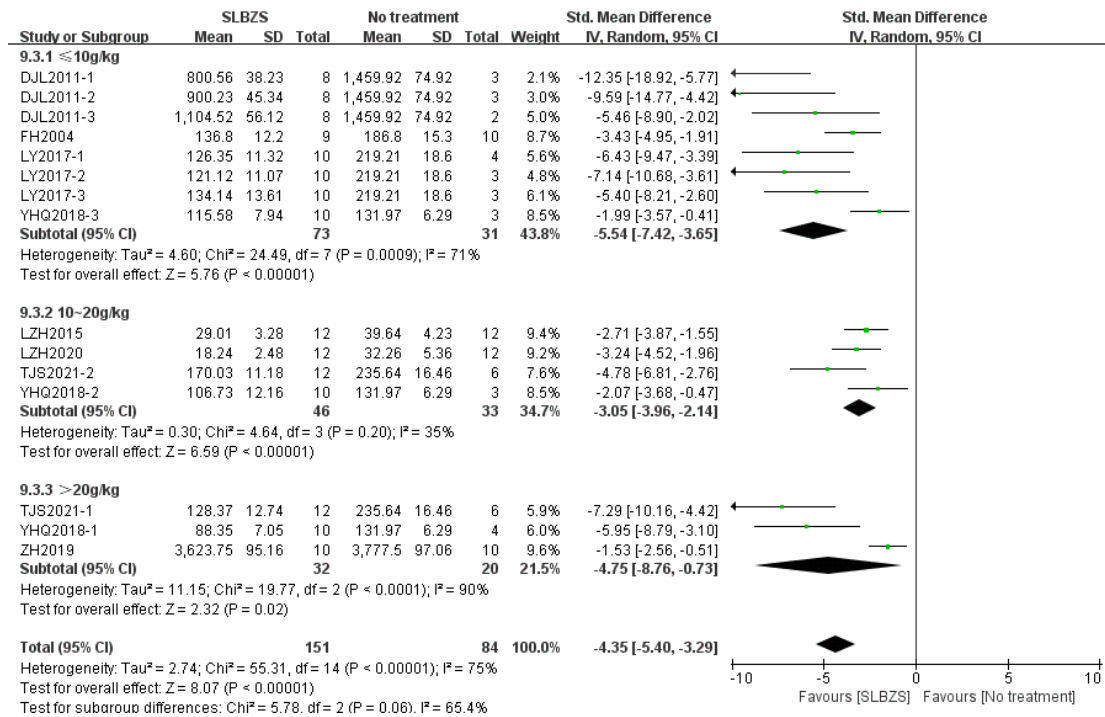

Supplementary figure S11 Subgroup analysis of IL-6 by different doses

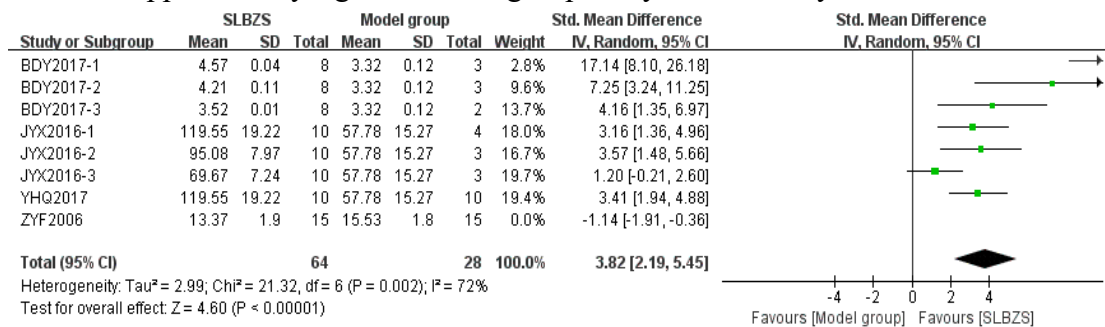

Supplementary figure S12 The results of IL-4.

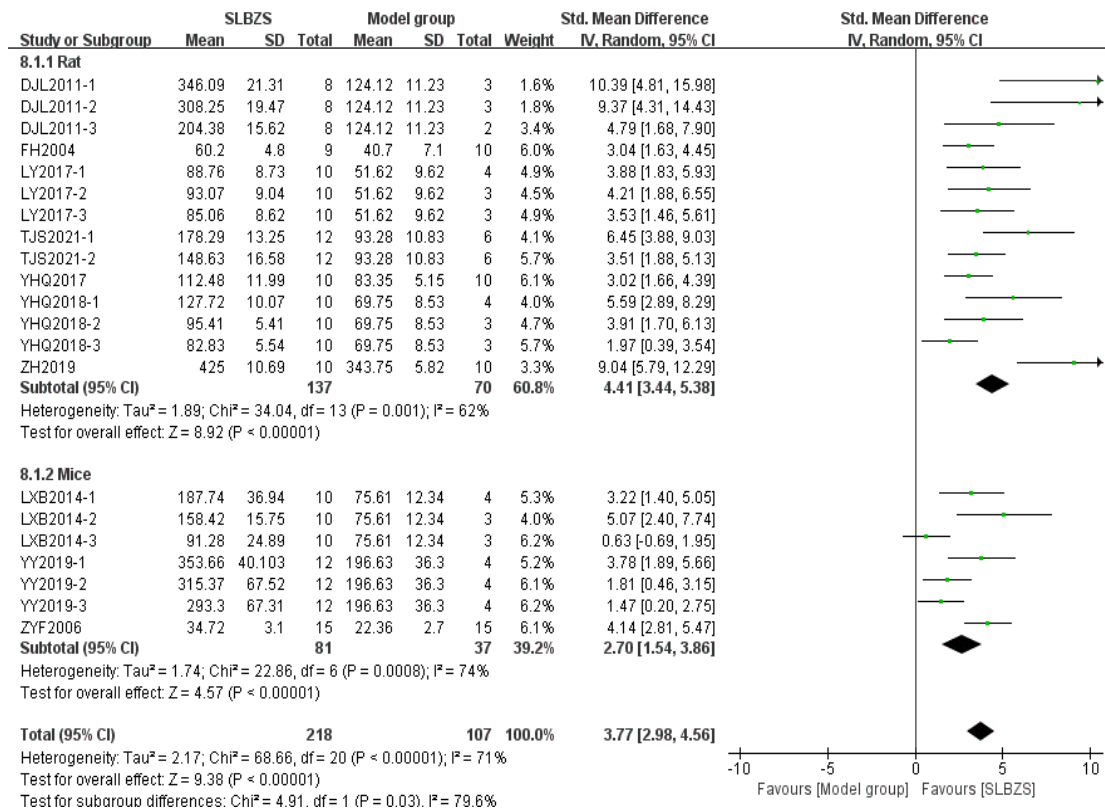

Supplementary figure S13 Subgroup analysis of IL-10 by animal species.

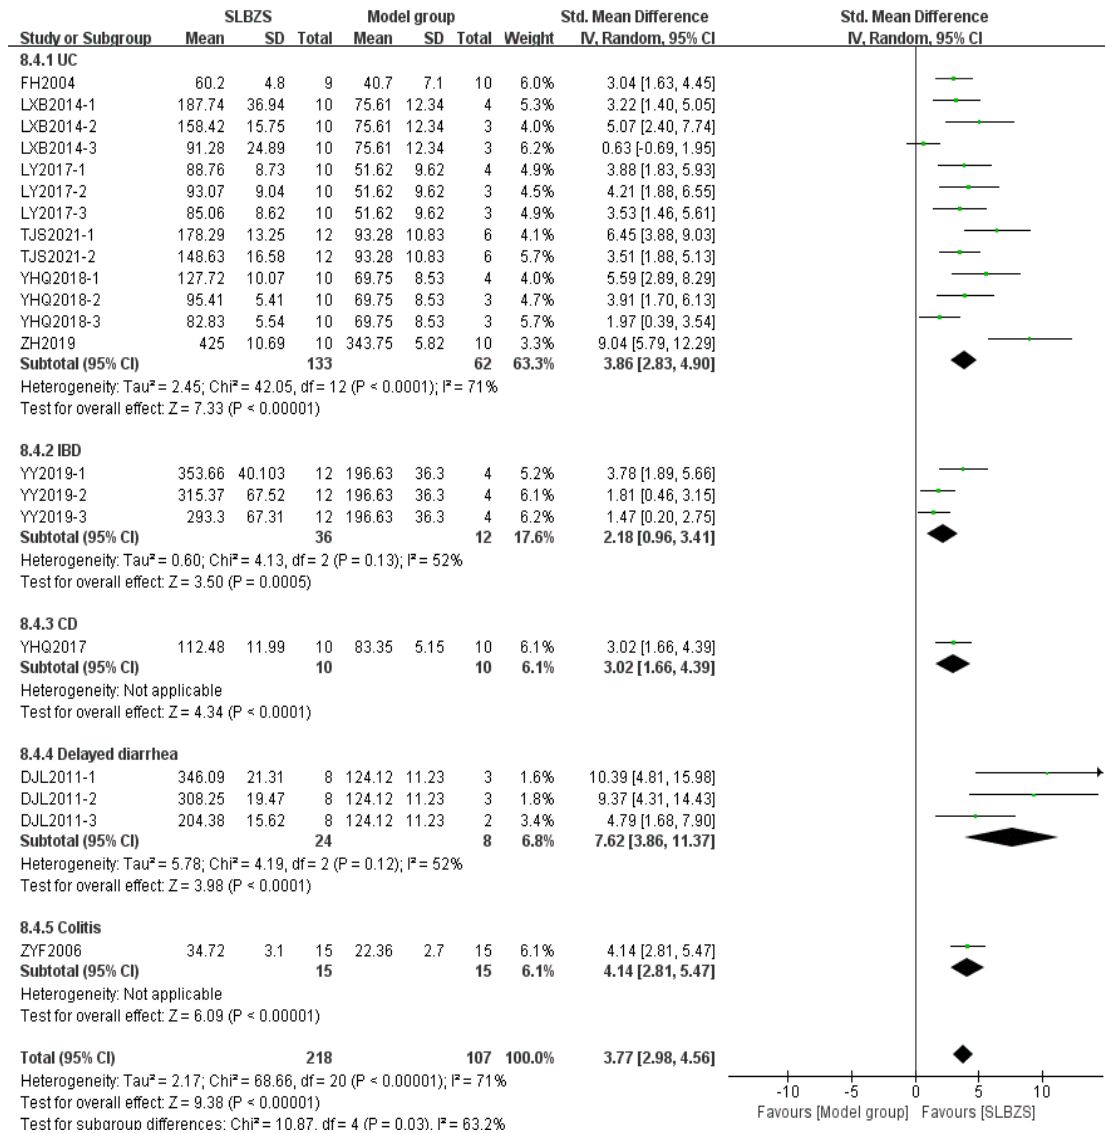

Supplementary figure S14 Subgroup analysis of IL-10 by disease model.



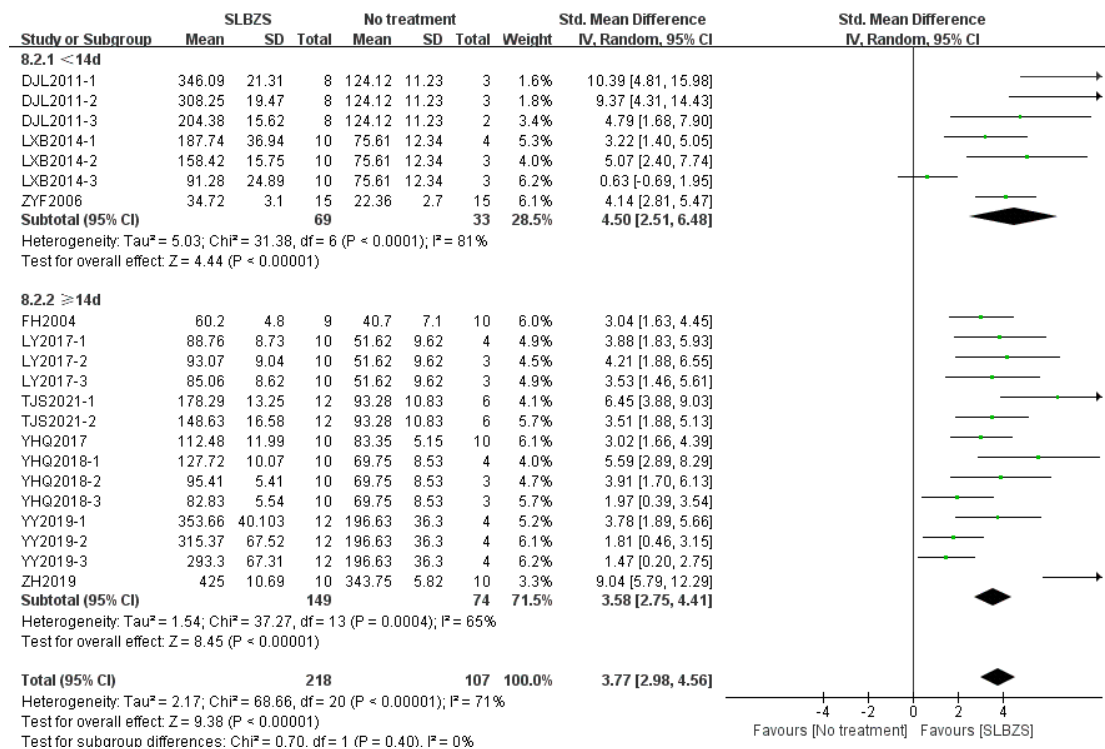

Supplementary figure S15 Subgroup analysis of IL-10 b y different duration

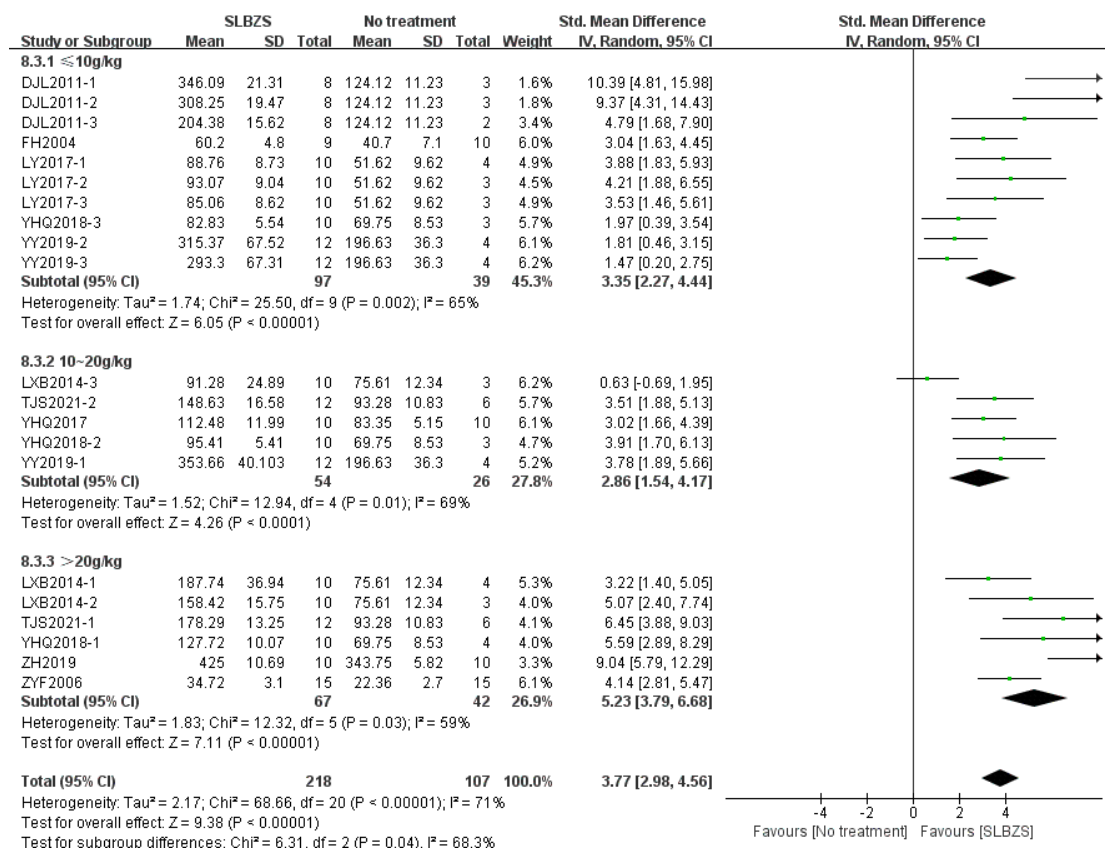

Supplementary figure S16 Subgroup analysis of IL-10 b y different doses

## Meta-analysis

|        | Pooled | 95% CI |       | Asymptotic |         | No. of  |
|--------|--------|--------|-------|------------|---------|---------|
| Method | Est    | Lower  | Upper | z_value    | p_value | studies |
| Fixed  | 3.364  | 2.972  | 3.757 | 16.798     | 0.000   | 21      |
| Random | 4.080  | 3.249  | 4.912 | 9.618      | 0.000   |         |

Test for heterogeneity: Q= 80.191 on 20 degrees of freedom (p= 0.000)

Moment-based estimate of between studies variance = 2.583

Trimming estimator: Linear

Meta-analysis type: Random-effects model

| iteration | estimate | Tn  | # to trim | diff |
|-----------|----------|-----|-----------|------|
| 1         | 4.080    | 128 | 1         | 231  |
| 2         | 3.921    | 139 | 2         | 22   |
| 3         | 3.773    | 148 | 3         | 18   |
| 4         | 3.533    | 166 | 5         | 36   |
| 5         | 3.249    | 177 | 6         | 22   |
| 6         | 3.149    | 183 | 7         | 12   |
| 7         | 3.070    | 185 | 7         | 4    |
| 8         | 3.070    | 185 | 7         | 0    |

## Filled

Meta-analysis (exponential form)

|        | Pooled | 95% CI |        | Asymptotic |         | No. of  |
|--------|--------|--------|--------|------------|---------|---------|
| Method | Est    | Lower  | Upper  | z_value    | p_value | studies |
| Fixed  | 19.106 | 13.167 | 27.725 | 15.530     | 0.000   | 28      |
| Random | 22.591 | 9.383  | 54.391 | 6.954      | 0.000   |         |

Test for heterogeneity: Q= 132.316 on 27 degrees of freedom (p= 0.000)

Moment-based estimate of between studies variance = 4.019

## Supplementary figure S17 The trim and fill Analysis results
